# Supplementary material
Source: HighWire-hosted journal article supplement (https://www.cmajopen.ca/highwire/filestream/80888/field_highwire_adjunct_files/1/open-2015-0089-original-submission.pdf)
Supplement: open-2015-0089-original-submission.pdf [file open-2015-0089-original-submission.pdf]

1  
2  
3 **Title:**  
4

5 **Multilevel exploration of the differences in the**  
6 **level of leisure-time physical activity among**  
7 **Canadian youth**  
8  
9

10  
11  
12  
13  
14  
15  
16  
17  
18  
19  
20  
21  
22  
23  
24  
25  
26  
27  
28  
29  
30  
31  
32  
33  
34  
35  
36  
37  
38  
39  
40  
41  
42  
43  
44  
45  
46  
47  
48  
49  
50  
51  
52  
53  
54  
55  
56  
57  
58  
59  
60

Confidential

1  
2  
3 The available scientific evidence supports the overall  
4 conclusion that leisure-time physical activity (LPA)  
5 provides fundamental health benefits for young people (1).  
6  
7  
8 The documented benefits include increased physical fitness  
9 (both cardiorespiratory fitness and muscular strength),  
10 reduced body fatness, favourable cardiovascular and  
11 metabolic disease risk profiles, enhanced bone health and  
12 reduced symptoms of depression (2-5). Among young people,  
13 the growth period is also shown as a critical time for the  
14 development of factors that have a great influence on  
15 health in adulthood, such as achieving an optimal bone  
16 wealth and a good fitness (e.g. aerobic capacity, muscular  
17 strength) (6).  
18  
19  
20  
21  
22  
23  
24  
25  
26  
27  
28  
29  
30  
31  
32  
33

34 Understanding what influences youth to engage in LPA  
35 contributes to evidence-based planning of public health  
36 interventions, as effective programs will target factors  
37 known to contribute to physical inactivity (7). Research  
38 into correlates or determinants of LPA has burgeoned over  
39 the past two decades, but has mostly focused on individual-  
40 level factors (8). Among them, socioeconomic status  
41 indicators such as education (9) and biological factors  
42 such as body mass index (BMI) (10) have been associated  
43 with disparities in LPA participation. While individuals  
44  
45  
46  
47  
48  
49  
50  
51  
52  
53  
54  
55  
56  
57  
58  
59  
60

1  
2  
3 characteristics are widely studied, environmental variables  
4  
5 are less studied, but are thought to have widespread  
6  
7 effects (8).  
8  
9

10  
11 A key principle is that a better understanding of all  
12  
13 levels of influence on youth LPA can inform development of  
14  
15 multilevel interventions which are recognized to offer the  
16  
17 best chance for success (11). Therefore, the aim of this  
18  
19 study was to provide a clearer picture of the differences  
20  
21 in the practice of LPA among young Canadians influenced by  
22  
23 contextual features of the living environment. The  
24  
25 objectives were: (a) to describe the geographic variations  
26  
27 of LPA among young Canadians over time and (b) to explore  
28  
29 how contextual features explain these variations. The  
30  
31 tested hypothesis was: *contextual features influence the*  
32  
33 *level of leisure time physical activity among youth.*  
34  
35  
36  
37  
38  
39

## 40 **Methods**

### 41 **Data source**

42  
43 The study used the Canadian Community Health Survey (CCHS)  
44  
45 from 2003 to 2011. The CCHS is repeated biennially and  
46  
47 contains self-reported information from a representative  
48  
49 sample of the non-institutionalized civilian population at  
50  
51 least 12 years old of age and living in the 10 Canadian  
52  
53 provinces (12).  
54  
55  
56  
57  
58  
59  
60

### **Study population and sample size**

The sample included Canadians from 12 to 17 years old for whom data on racial origin, highest household education level, BMI and geographic position are available through CCHS. The following population segments were excluded for consistency with the research design: pregnant girls, persons living in the Athabasca Health Authority region (in compliance with confidentiality requirements), respondents interviewed by proxies and some observations lacking geographical concordance. Overall, this study relied on socioeconomic characteristics and LPA behaviours of 54,832 youth (Table 1).

### **Geographical structure**

Observations were structured according to a four-level geographical hierarchy (i.e. individuals, neighbourhoods, health regions and provinces) based on Statistics Canada 2006 census units administrative structure. A neighbourhood was assigned to each individual according to their place of residence (six positions postal code). When a place of residence was located in an urban setting, i.e. included in a census metropolitan area (CMA) or a census agglomeration (CA), the "neighbourhood" corresponds to the Statistics Canada census tract (CT), otherwise it was attributed to the corresponding census subdivision (CSD) or the

1  
2  
3 municipality. The combination of CTs and CSDs enables the  
4  
5 creation of comparable neighbourhood units that reflect the  
6  
7 heterogeneity of the land use mix surrounding individuals'  
8  
9 place of residence whether they are located in an urban or  
10  
11 a rural setting. A detailed methodology of the geographical  
12  
13 structure is presented elsewhere (13). Some Canadian health  
14  
15 regions boundaries were modified during the study period.  
16  
17 The geographic structure of all health regions were  
18  
19 harmonized using the Statistics Canada digital boundary  
20  
21 file reflecting health region limits in effect as of  
22  
23 October 2011 (14). ArcMap (release 10.1) was used for the  
24  
25 geospatial processing. The final data hierarchical  
26  
27 structure comprised 26,822 girls and 28,010 boys located in  
28  
29 6004 neighbourhoods, within 112 health regions, and  
30  
31 distributed through the 10 Canadian provinces.  
32  
33  
34  
35  
36  
37

### 38 **Outcome**

39  
40 The dependant variable studied was a dichotomous indicator  
41  
42 of LPA which refers to achieving (or not) the recommended  
43  
44 daily level for physical activity performed during leisure-  
45  
46 time. To produce health benefits, it was suggested that  
47  
48 young people aged 12-17 years should accumulate an average  
49  
50 of at least 60 minutes of moderate to vigorous-intensity  
51  
52 physical activity (MVPA) daily (15, 16). Physical activity  
53  
54 level was estimated by the average energy expenditure (Kcal  
55  
56  
57  
58  
59  
60

1  
2  
3 / Kg / week) in which are considered the frequency,  
4  
5 duration and intensity of 17 types of self-reported LPA. By  
6  
7 definition, MVPA requires the achievement of specific and  
8  
9 quantifiable intensity threshold which will vary depending  
10  
11 on the activity performed. When not directly measured,  
12  
13 intensity can be derived from a table providing values of  
14  
15 Metabolic Equivalent of Task (METs) attributed to the  
16  
17 various activities (17). Taking into account the  
18  
19 theoretical works set out above and the available data, we  
20  
21 considered that an "active" youth is one that achieves an  
22  
23 index of energy expenditure of at least 30 Kcal / Kg / week  
24  
25 (18) with a frequency of 5 days/week or more.  
26  
27  
28  
29  
30  
31

32 Table 1 presents summary statistics of the achievement of  
33  
34 recommended daily level of LPA among girls and boys. In the  
35  
36 sample studied, 36.9% of the girls achieved the standard,  
37  
38 and 51.9% of the boys.  
39  
40  
41  
42

43  
44 **Table 1:** Outcome and covariates distribution for girls and  
45  
46 boys  
47

#### 48 **Individual variables**

49  
50 To account for the consistently documented influences of  
51  
52 various individual characteristics on LPA among youth (19-  
53  
54 21), age, racial origin, highest education level in the  
55  
56  
57  
58  
59  
60

1  
2  
3 household and BMI were used as control variables. Table 1  
4 presents the distribution of samples by all covariates and  
5  
6 shows that a typical youth of the CCHS sample is  
7  
8 predominantly Caucasian, living in an educated household  
9  
10 and reporting a normal BMI.  
11  
12  
13

### 14 15 **Cycle and season**

16  
17 The CCHS produces a biennial microdata file combining two  
18  
19 years of data collected from January to December. Knowing  
20  
21 the exact date of sampling allowed us to discern  
22  
23 differences in LPA participation depending on the season.  
24  
25 Three seasons have been created to take into account the  
26  
27 question asking the respondent on physical activity  
28  
29 performed in the 3 months prior to the administration of  
30  
31 the survey: Summer (July to October), Winter (February to  
32  
33 March) and Transitional (November to January & April to  
34  
35 June).  
36  
37  
38  
39  
40  
41

### 42 **Contextual variables**

43  
44 Three independent area-level variables were considered. The  
45  
46 first is the Census metropolitan influenced zone (MIZ). MIZ  
47  
48 focuses on the municipalities that are outside of the  
49  
50 existing census metropolitan areas (CMA) and census  
51  
52 agglomerations (CA) and assess the degree to which all  
53  
54 CMA/CA influence these municipalities, as measured by  
55  
56  
57  
58  
59  
60

1  
2  
3 commuting flows and divided in 8 zones. These zones were  
4  
5 grouped into three influence zones to represent the  
6  
7 continuum in the variety of living environments such as  
8  
9 urban settings (MIZ 1-3), suburban (MIZ 4-5), and rural  
10  
11 (MIZ 6-8). A detailed methodology of the construction of  
12  
13 MIZ is provided by Statistics Canada (22).  
14  
15

16  
17  
18 The two other contextual variables were based on the factor  
19  
20 score of two dimensions issued from a principal component  
21  
22 analysis (PCA) and estimate the material and social  
23  
24 deprivation of the neighbourhood units where the  
25  
26 individual's residence is located. The social aspect was  
27  
28 built on the proportion of individuals that are separated,  
29  
30 divorced or widowed, the proportion of people living alone,  
31  
32 and the proportion in single-parent families. Using the  
33  
34 same PCA approach, the material deprivation index was built  
35  
36 with the mean income of the neighbourhood, the proportion  
37  
38 of people without a high school diploma, and the proportion  
39  
40 of unemployed (23). As deprivation is seen as a relative  
41  
42 disadvantage facing the community to which an individual  
43  
44 belongs, the distribution of neighbourhoods' indexes was  
45  
46 broken into quintiles within each province.  
47  
48  
49  
50  
51

### 52 53 54 **Statistical analysis**

55  
56  
57  
58  
59  
60



1  
2  
3 To investigate the influence of the contextual variables, a  
4 series of multilevel logistic regression analyses were  
5 conducted using the procedure of Markov chain Monte Carlo  
6 (MCMC) (24). The modelling strategy was based on four  
7 aggregate models. The first model referred to the variance  
8 component and expresses the distribution of variance  
9 between the four geographic levels described above. The  
10 second introduced control variables, cycle and season. The  
11 third introduced the MIZ. The last model introduced the  
12 neighbourhood's social and material deprivation level. The  
13 Deviance Information Criteria (DIC) was used to compare a  
14 model's goodness of fit (25). The median odds ratio (MOR)  
15 was used to translate the area level variance in the widely  
16 used odds ratio (OR) scale, which has a consistent and  
17 intuitive interpretation (26).  
18  
19  
20  
21  
22  
23  
24  
25  
26  
27  
28  
29  
30  
31  
32  
33  
34  
35  
36  
37  
38

39 All analyses were stratified by sex to control for the  
40 differences in LPA between girls and boys (27). In order to  
41 be representative at population level, standardised CCHS  
42 survey design weights were used.  
43  
44  
45  
46  
47  
48

### 49 **Province level residuals analysis**

50  
51 We further used the province-level residuals and associated  
52 standard error to plot and rank the odds ratio and the 95%  
53 confidence interval (CI) for each province. This procedure  
54  
55  
56  
57  
58  
59  
60

1  
2  
3 allowed a visualization of provinces that are presenting a  
4 significantly different LPA level from the national mean.  
5  
6  
7

## 8 **Results**

### 9 **Girls**

10  
11 According to the multilevel analysis results (Table 2), the  
12 DIC showed that the introduction of Model 2 and 3 led to a  
13 better fit of the overall model ( $\Delta$ DIC=-536), while Model 4  
14 (which includes indices of material and social deprivation)  
15 showed the opposite trend. The reference category is a  
16 girl, age 12-15, Caucasian, living in a highly educated  
17 household, reporting a normal weight, surveyed during  
18 summer and living in an urban setting. The results showed  
19 lower odds of achieving LPA standards among older girls  
20 (16-17 year old), Asian ethnicity, living in a household  
21 with lower educational achievement, reporting either being  
22 under- or overweight, surveyed during winter or  
23 transitional season, and living in an urban setting.  
24 Whereas the best fitting Model 3 showed no global between-  
25 province variation, significant variations were observed  
26 between health regions (MOR=1.12) and between  
27 neighbourhoods (MOR=1.17) within the provinces. Observing  
28 that Model 4 did not fit as well, and that deprivation  
29 variables were not significant, it has not been the focus  
30 of further interpretation in this paper.  
31  
32  
33  
34  
35  
36  
37  
38  
39  
40  
41  
42  
43  
44  
45  
46  
47  
48  
49  
50  
51  
52  
53  
54  
55  
56  
57  
58  
59  
60

1  
2  
3 **Table 2.** Individual, cycle, season and contextual factors  
4 on girls' leisure-time physical activity  
5  
6  
7

8  
9 **Boys**

10 The results for boys (Table 3) also showed that the  
11 introduction of Model 2 and 3 led to a better fit of the  
12 overall model ( $\Delta\text{DIC}=-643$ ). With the exception of the sex,  
13 the reference category remained unchanged as compared to  
14 girls. The results showed lower odds of achieving LPA  
15 standards among older (16-17 years old), Asian boys,  
16 reporting being under- or overweight, and surveyed during  
17 winter or transitional seasons. Unlike girls, however, the  
18 household education level appeared to have less impact on  
19 achieving LPA standards whereas living in suburban or rural  
20 areas appeared to have no impact. Moreover, the time  
21 variable showed significant differences between each cycle  
22 of the survey (OR=0.98) suggesting a slight decrease in  
23 achieving the LPA standard for boys. As for girls,  
24 significant variations were observed in Model 3 between  
25 health regions (MOR=1.13) and between neighbourhoods  
26 (MOR=1.16) within the provinces, whereas no significant  
27 between-province variation was observed. Again, Model 4  
28 will not be interpreted in more depth.  
29  
30  
31  
32  
33  
34  
35  
36  
37  
38  
39  
40  
41  
42  
43  
44  
45  
46  
47  
48  
49  
50  
51  
52  
53  
54

55  
56 **Table 3.** Individual, cycle, season and contextual factors  
57 on boys' leisure-time physical activity  
58  
59  
60

### Variation between provinces

Although no significant variation was observed in the global LPA level between provinces, the analysis of the province specific residuals performed on Model 3 allowed to identify if areas presenting a LPA level significantly higher or lower than the country-wide estimates above individual and contextual characteristics. Figure 1A shows that girls living in Quebec were less likely to achieve a sufficient level of LPA compared with the national average, whereas girls living in Ontario and British-Columbia were more likely to meet the standard. Among boys (Figure 1B), only those living in Ontario were more likely to achieve the standard, whereas boys living in other provinces remained within the CI of the national average.

**Figure 1.** Province-level residuals of the logarithm of the odds ratio among (1A) Girls & (1B) Boys

### Interpretation

This study explored differences in the practice of LPA among Canadian youth according to their life context. A four-level model was applied and adjusted for individual and contextual characteristics. After adjusting for age, racial origin, household education level and BMI, the

1  
2  
3 results showed that contextual features of the living  
4 environment were associated with the odds of an individual  
5 to accumulate an average of at least 60 minutes of moderate  
6 to vigorous-intensity LPA. Moreover, these influences were  
7 not always the same between girls and boys. To remain  
8 consistent with the study design, the influence of time,  
9 season and area-based variables will be discussed in this  
10 order.  
11  
12  
13  
14  
15  
16  
17  
18  
19  
20  
21

22  
23 Whereas no trend was observed among girls, a decrease of 2%  
24 in the odds of achieving physical activity guidelines by  
25 LPA between each cycle suggested a downward trend of the  
26 practice of LPA among boys since 2003. Although this trend  
27 is relatively small, it may highlight the importance to  
28 survey more closely physical activity trends among boys. No  
29 trend was detected for girls, but it was clearly observed  
30 that their LPA level remained significantly lower than boys  
31 as reported in other Canadian investigations (28, 29),  
32 reinforcing the idea to keep a closer consideration for sex  
33 specific needs when planning public health interventions. A  
34 proposed area of improvement involves strategies to ensure  
35 equitable access to resources, including availability and  
36 access to suitable physical education classes and/or  
37  
38  
39  
40  
41  
42  
43  
44  
45  
46  
47  
48  
49  
50  
51  
52  
53  
54  
55  
56  
57  
58  
59  
60

1  
2  
3 organized sports which may be subject to sex-related  
4 inequities (30, 31).  
5  
6

7  
8 Season appeared to have a highly significant influence.  
9  
10 Regardless of sex, winter was observed as a major barrier  
11 to performing LPA. This finding supported previous results  
12 that found an influence of seasonality on LPA among various  
13 populations, including young Canadians (32, 33). For that  
14 reason, the need to account for seasonality when developing  
15 interventions and programs targeting physical activity may  
16 be advantageous.  
17  
18

19  
20 Suburban and rural areas were associated with higher odds  
21 to meet physical activity guidelines by LPA among girls.  
22 This result conflicts with previous findings showing the  
23 opposite pattern (34). It suggests that facilities  
24 available in urban areas might either be more suitable for  
25 boys, or that girl's inclination to engage in physical  
26 activity around the home environment makes them less  
27 sensitive to the accessibility of community facilities  
28 (35).  
29  
30

31  
32 Observing that the introduction of area-based indices of  
33 material and social deprivation led to a poorer fit of the  
34 overall model, no conclusions could be drawn about their  
35 association with the odds of achieving the physical  
36  
37  
38  
39  
40  
41  
42  
43  
44  
45  
46  
47  
48  
49  
50  
51  
52  
53  
54  
55  
56  
57  
58  
59  
60

1  
2  
3 activity guidelines by LPA. Yet, a recent analysis of the  
4  
5 influence of these indices among Quebec High School  
6  
7 students have shown that students from very privileged  
8  
9 backgrounds on both material and social counts are  
10  
11 proportionally more active than those from disadvantaged  
12  
13 backgrounds (36). This finding suggests that the contextual  
14  
15 effect of deprivation may vary importantly at the local  
16  
17 level. Put differently, the deprivation level of a  
18  
19 neighbourhood may influence youth LPA in some settings,  
20  
21 while having a lesser or no impact in others. As proposed  
22  
23 by Wilkinson and Marmot (37), the impact of deprivation on  
24  
25 health determinants may be relative to the social context  
26  
27 and not necessarily absolute, making it difficult to  
28  
29 isolate the impact at the national level. More context  
30  
31 specific investigations are required to explore the causes  
32  
33 of these contrasting observations.  
34  
35  
36  
37  
38  
39  
40

41 Whereas the between-province variance distribution showed  
42  
43 no significant differences globally, residual analysis of  
44  
45 provincial units highlighted some provinces which are  
46  
47 different from the Canadian average. The relatively poor  
48  
49 odds to achieve LPA standards observed among girls living  
50  
51 in Quebec raises the question as to why Quebec girls tend  
52  
53 to be much less active than other Canadians, and provide  
54  
55  
56  
57  
58  
59  
60

1  
2  
3 rationale for further investigation on how physical  
4 activity is promoted in that province. As Ontario had  
5 better performing boys and girls than the national average,  
6 it may help to study contextual and policy differences  
7 there (in comparison to the other provinces).  
8  
9

10  
11  
12  
13  
14  
15  
16 Several limitations need to be kept in mind when  
17 interpreting results. Even if the sample is distributed in  
18 a nine-year period, the cross-sectional design of the data  
19 limits its ability to establish causal inferences,  
20 particularly with respect to contextual effects. Also, a  
21 self-reported data of physical activity is likely to be  
22 influenced by “social desirability” (38). Moreover, CCHS  
23 data on LPA aims to account for all activities completed  
24 over a period of three months prior to the administration  
25 of the survey. For that reason, the level of precision on  
26 duration and intensity of physical activity remains  
27 questionable as recall for non-repeating activities would  
28 likely be more difficult and there would likely be a bias  
29 to LPA where individuals are inscribed (e.g. lessons,  
30 league sports, etc.). Further, available data do not take  
31 into account physical activity performed for utilitarian  
32 purposes such as active transport which are more common in  
33 central, and often deprived, neighbourhoods (39). The  
34  
35  
36  
37  
38  
39  
40  
41  
42  
43  
44  
45  
46  
47  
48  
49  
50  
51  
52  
53  
54  
55  
56  
57  
58  
59  
60



1  
2  
3 inclusion of utilitarian physical activity may enhance the  
4 effects of contextual features among youth and would carry  
5 this exploration one step further.  
6  
7  
8  
9

10  
11 Notwithstanding these limitations, this exploratory analyse  
12 provides an important insight on the contextual differences  
13 of the level of LPA among Canadian youth based on a large  
14 sample, a combination of individual and contextual  
15 information and a multilevel framework which makes it  
16 possible to unveil context-specific variations (e.g.  
17 between provinces or regions). It shows differences that  
18 extend beyond individual level associations and provides  
19 new information to better understand the distribution of  
20 leisure-time physical activity of youth between Canadian  
21 regions.  
22  
23  
24  
25  
26  
27  
28  
29  
30  
31  
32  
33  
34  
35  
36

### 37 **REFERENCES**

- 38 1. WHO. Global Recommendations on Physical Activity for Health. Geneva: 2010.
- 39 2. Janssen I. Physical activity guidelines for children and youth. *Can J Public Health*.  
40 2007;98 Suppl 2:S109-21. PubMed PMID: 18213942.
- 41 3. Janssen I, Leblanc AG. Systematic review of the health benefits of physical activity and  
42 fitness in school-aged children and youth. *The international journal of behavioral nutrition and*  
43 *physical activity*. 2010;7:40. PubMed PMID: 20459784. Pubmed Central PMCID: 2885312.
- 44 4. PAGAC. Physical Activity Guidelines Advisory Committee Report. Washington, DC: US  
45 Department of Health and Human Services, 2008.
- 46 5. Warburton DE, Nicol CW, Bredin SS. Health benefits of physical activity: the evidence.  
47 *Canadian medical association journal*. 2006;174(6):801-9.
- 48 6. CSKQ. L'activité physique et le poids corporel : Avis du comité. Québec: Ministère de  
49 l'Éducation, du Loisir et du Sport, 2006.
- 50 7. Sallis JFO, N.; Fotheringham, M. J. Behavioral epidemiology: a systematic framework to  
51 classify phases of research on health promotion and disease prevention. *Annals of behavioral*  
52  
53  
54  
55  
56  
57  
58  
59  
60

1  
2  
3  
4  
5  
6  
7  
8  
9  
10  
11  
12  
13  
14  
15  
16  
17  
18  
19  
20  
21  
22  
23  
24  
25  
26  
27  
28  
29  
30  
31  
32  
33  
34  
35  
36  
37  
38  
39  
40  
41  
42  
43  
44  
45  
46  
47  
48  
49  
50  
51  
52  
53  
54  
55  
56  
57  
58  
59  
60

medicine : a publication of the Society of Behavioral Medicine. 2000 Fall;22(4):294-8. PubMed PMID: 11253440.

8. Bauman AE, Reis RS, Sallis JF, Wells JC, Loos RJ, Martin BW, et al. Correlates of physical activity: why are some people physically active and others not? *Lancet*. 2012 Jul 21;380(9838):258-71. PubMed PMID: 22818938.

9. Van der Horst K, Paw M, Twisk JW, Van Mechelen W. A brief review on correlates of physical activity and sedentariness in youth. *Medicine and science in sports and exercise*. 2007;39(8):1241.

10. Patnode CD, Lytle LA, Erickson DJ, Sirard JR, Barr-Anderson D, Story M. The relative influence of demographic, individual, social, and environmental factors on physical activity among boys and girls. *The international journal of behavioral nutrition and physical activity*. 2010;7:79. PubMed PMID: 21047429. Pubmed Central PMCID: 2991277.

11. Sallis JF, Owen N, Fisher EB. Ecological models of health behavior. In: Glanz KR, B.K.; Viswanath, K., editor. *Health Behavior and Health Education: Theory, Research, and Practice*; Wiley; 2008.

12. StatCan. *Canadian Community Health Survey - Annual component*. 2014.

13. Lalonde BeL, A. . Indicateurs socioéconomiques pour les communautés Canadiennes, Rapport méthodologique. Plateforme d'évaluation en prévention de l'obésité, 2015.

14. StatCan. *Health regions: boundaries and correspondence with census geography*. 2011.

15. CSEP. *Canadian Physical Activity Guidelines: Clinical Practice Guidelines Report*. Ottawa: 2011.

16. Tremblay MS, Warburton DER, Janssen I, Paterson DH, Latimer AE, Rhodes RE, et al. *New Canadian Physical Activity Guidelines*. *Applied Physiology, Nutrition, and Metabolism*. 2011;36(1):36-46. PubMed PMID: 21326376.

17. Ainsworth BE, Haskell WL, Whitt MC, Irwin ML, Swartz AM, Strath SJ, et al. Compendium of physical activities: an update of activity codes and MET intensities. *Medicine and science in sports and exercise*. 2000 Sep;32(9 Suppl):S498-504. PubMed PMID: 10993420. Epub 2000/09/19. eng.

18. Nolin B. *Indice d'activité physique : codification, critères et algorithmes – Enquête québécoise sur la santé des jeunes du secondaire (EQSJS) 2010-2011*. Québec: 2012.

19. Gortmaker SL, Lee R, Cradock AL, Sobol AM, Duncan DT, Wang YC. Disparities in youth physical activity in the United States: 2003-2006. *Medicine and science in sports and exercise*. 2012;44(5):888-93.

20. Nader PR, Bradley RH, Houts RM, McRitchie SL, O'Brien M. Moderate-to-vigorous physical activity from ages 9 to 15 years. *Jama*. 2008 Jul 16;300(3):295-305. PubMed PMID: 18632544.

21. Whitt-Glover MC, Taylor WC, Floyd MF, Yore MM, Yancey AK, Matthews CE. Disparities in physical activity and sedentary behaviors among US children and adolescents: prevalence, correlates, and intervention implications. *Journal of public health policy*. 2009;30 Suppl 1:S309-34. PubMed PMID: 19190581.

22. McNiven C, Puderer H, Janes D. Census Metropolitan Area and Census Agglomeration Influenced Zones (MIZ): A Description of the Methodology. In: Canada GDS, editor. Ottawa2000.

23. Pampalon R, Raymond G. Indice de défavorisation matérielle et sociale : son application au secteur de la santé et du bien-être. *Santé, Société et Solidarité*. 2003;1:191-208.

24. Browne WJ. *MCMC Estimation in MLwiN, v2.26*. University of Bristol2014.

25. Spiegelhalter DJ, Best NG, Carlin BP, Van Der Linde A. Bayesian measures of model complexity and fit. *Journal of the Royal Statistical Society: Series B (Statistical Methodology)*. 2002;64(4):583-639.

- 1
  - 2
  - 3
  - 4
  - 5
  - 6
  - 7
  - 8
  - 9
  - 10
  - 11
  - 12
  - 13
  - 14
  - 15
  - 16
  - 17
  - 18
  - 19
  - 20
  - 21
  - 22
  - 23
  - 24
  - 25
  - 26
  - 27
  - 28
  - 29
  - 30
  - 31
  - 32
  - 33
  - 34
  - 35
  - 36
  - 37
  - 38
  - 39
  - 40
  - 41
  - 42
  - 43
  - 44
  - 45
  - 46
  - 47
  - 48
  - 49
  - 50
  - 51
  - 52
  - 53
  - 54
  - 55
  - 56
  - 57
  - 58
  - 59
  - 60
26. Merlo J, Chaix B, Ohlsson H, Beckman A, Johnell K, Hjerpe P, et al. A brief conceptual tutorial of multilevel analysis in social epidemiology: using measures of clustering in multilevel logistic regression to investigate contextual phenomena. *Journal of epidemiology and community health*. 2006 Apr;60(4):290-7. PubMed PMID: 16537344. Pubmed Central PMCID: 2566165.
27. Duncan SC, Duncan TE, Strycker LA, Chaumeton NR. A cohort-sequential latent growth model of physical activity from ages 12 to 17 years. *Annals of behavioral medicine : a publication of the Society of Behavioral Medicine*. 2007 Feb;33(1):80-9. PubMed PMID: 17291173. Pubmed Central PMCID: 2729662.
28. Godin G, Anderson D, Lambert L-D, Desharnais R. Identifying factors associated with regular physical activity in leisure time among Canadian adolescents. *American Journal of Health Promotion*. 2005;20(1):20-7.
29. Colley RC, Garriguet D, Janssen I, Craig CL, Clarke J, Tremblay MS. Physical activity of Canadian children and youth: accelerometer results from the 2007 to 2009 Canadian Health Measures Survey. 2011.
30. Butler GP, Orpana HM, Wiens AJ. By your own two feet: factors associated with active transportation in Canada. *Can J Public Health*. 2007 Jul-Aug;98(4):259-64. PubMed PMID: 17896732.
31. Veugelers PJ, Fitzgerald AL. Prevalence of and risk factors for childhood overweight and obesity. *Canadian Medical Association Journal*. 2005 Sep;173(6):607-13. PubMed PMID: WOS:000231620100019.
32. Tucker P, Gilliland J. The effect of season and weather on physical activity: A systematic review. *Public Health*.121(12):909-22.
33. Bélanger M, Gray-Donald K, O'Loughlin J, Paradis G, Hanley J. Influence of Weather Conditions and Season on Physical Activity in Adolescents. *Annals of Epidemiology*.19(3):180-6.
34. Bruner MW, Lawson J, Pickett W, Boyce W, Janssen I. Rural Canadian adolescents are more likely to be obese compared with urban adolescents. *International Journal of Pediatric Obesity*. 2008;3(4):205-11.
35. Dunton GF, Jamner MS, Cooper DM. Assessing the perceived environment among minimally active adolescent girls: validity and relations to physical activity outcomes. *American Journal of Health Promotion*. 2003;18(1):70-3.
36. Traoré I, Nolin B, Pica LA. « Activité physique de loisirs et de transport », dans, L'Enquête québécoise sur la santé des jeunes du secondaire 2010-2011. Québec: 2012.
37. Wilkinson R, Marmot M. Social determinants of health: the solid facts. Geneva, Switzerland: World Health Organization; 2003. 2013.
38. Katzmarzyk PT, Tremblay MS. Limitations of Canada's physical activity data: implications for monitoring trends. *Can J Public Health*. 2007;98 Suppl 2:S185-94. PubMed PMID: 18213948.
39. Pabayo RA, Gauvin L, Barnett TA, Morency P, Nikiema B, Seguin L. Understanding the determinants of active transportation to school among children: evidence of environmental injustice from the Quebec Longitudinal Study of Child Development. *Health & place*. 2012 Mar;18(2):163-71. PubMed PMID: 21937255.

|    | Girls n=26822                                                                | Boys n=28010 |
|----|------------------------------------------------------------------------------|--------------|
| 1  |                                                                              |              |
| 2  |                                                                              |              |
| 3  | <b>Outcome: Achievement of recommended daily level for physical activity</b> |              |
| 4  | Active                                                                       | 36.9%        |
| 5  | <b>Individual</b>                                                            |              |
| 6  | <b>Age</b>                                                                   |              |
| 7  | 12-15                                                                        | 65.8%        |
| 8  | 16-17                                                                        | 34.2%        |
| 9  | <b>Origin</b>                                                                |              |
| 10 | Caucasian                                                                    | 74.7%        |
| 11 | Asian                                                                        | 10.4%        |
| 12 | Others                                                                       | 8.6%         |
| 13 | Unknown                                                                      | 6.4%         |
| 14 | <b>Household education Level</b>                                             |              |
| 15 | University                                                                   | 33.0%        |
| 16 | High School and College                                                      | 49.8%        |
| 17 | Less than High School                                                        | 3.6%         |
| 18 | Unknown                                                                      | 13.7%        |
| 19 | <b>BMI</b>                                                                   |              |
| 20 | Normal weight                                                                | 68.0%        |
| 21 | Underweight                                                                  | 10.8%        |
| 22 | Overweight                                                                   | 10.7%        |
| 23 | Obese                                                                        | 2.8%         |
| 24 | Unknown                                                                      | 7.8%         |
| 25 | <b>Cycle</b>                                                                 |              |
| 26 | (1) 2003-2004                                                                | 23.4%        |
| 27 | (2) 2005-2006                                                                | 21.3%        |
| 28 | (3) 2007-2008                                                                | 18.9%        |
| 29 | (4) 2009-2010                                                                | 18.7%        |
| 30 | (5) 2011-2012                                                                | 17.8%        |
| 31 | <b>Season</b>                                                                |              |
| 32 | Summer                                                                       | 34.4%        |
| 33 | Winter                                                                       | 18.3%        |
| 34 | Transitional                                                                 | 47.3%        |
| 35 | <b>Area-based</b>                                                            |              |
| 36 | <b>MIZ</b>                                                                   |              |
| 37 | Urban                                                                        | 80.6%        |
| 38 | Suburban                                                                     | 12.1%        |
| 39 | Rural                                                                        | 7.3%         |
| 40 | <b>Material deprivation quintile</b>                                         |              |
| 41 | Most privileged                                                              | 17.4%        |
| 42 | Privileged                                                                   | 22.5%        |
| 43 | Median                                                                       | 28.2%        |
| 44 | Deprived                                                                     | 21.2%        |
| 45 | Most deprived                                                                | 10.8%        |
| 46 | <b>Social deprivation quintile</b>                                           |              |
| 47 | Most privileged                                                              | 12.9%        |
| 48 | privileged                                                                   | 23.6%        |
| 49 | Median                                                                       | 27.7%        |
| 50 | Deprived                                                                     | 24.8%        |
| 51 | Most deprived                                                                | 11.1%        |
| 52 |                                                                              |              |
| 53 |                                                                              |              |
| 54 |                                                                              |              |
| 55 |                                                                              |              |
| 56 |                                                                              |              |
| 57 |                                                                              |              |
| 58 |                                                                              |              |
| 59 |                                                                              |              |
| 60 |                                                                              |              |

|                               | <i>Null Model</i> |       | <i>Model 2</i>  |            | <i>Model 3</i>  |            | <i>Model 4</i>  |            |
|-------------------------------|-------------------|-------|-----------------|------------|-----------------|------------|-----------------|------------|
|                               | OR                | 95%CI | OR              | 95%CI      | OR              | 95%CI      | OR              | 95%CI      |
| <b>Individual</b>             |                   |       |                 |            |                 |            |                 |            |
| Age                           |                   |       |                 |            |                 |            |                 |            |
| 12-15                         |                   |       | <b>1.00</b>     |            | <b>1.00</b>     |            | <b>1.00</b>     |            |
| 16-17                         |                   |       | <b>0.76</b>     | 0.72-0.80* | <b>0.76</b>     | 0.72-0.80* | <b>0.76</b>     | 0.72-0.80* |
| Origin                        |                   |       |                 |            |                 |            |                 |            |
| Caucasian                     |                   |       | <b>1.00</b>     |            | <b>1.00</b>     |            | <b>1.00</b>     |            |
| Asian                         |                   |       | <b>0.65</b>     | 0.57-0.73* | <b>0.66</b>     | 0.58-0.74* | <b>0.66</b>     | 0.59-0.75* |
| Others                        |                   |       | <b>0.98</b>     | 0.88-1.10  | <b>1.00</b>     | 0.89-1.11  | <b>1.00</b>     | 0.90-1.12  |
| Unknown                       |                   |       | <b>1.07</b>     | 0.98-1.18  | <b>1.07</b>     | 0.97-1.17  | <b>1.07</b>     | 0.98-1.18  |
| Household education level     |                   |       |                 |            |                 |            |                 |            |
| University                    |                   |       | <b>1.00</b>     |            | <b>1.00</b>     |            | <b>1.00</b>     |            |
| High School and College       |                   |       | <b>0.85</b>     | 0.8-0.90*  | <b>0.84</b>     | 0.79-0.89* | <b>0.84</b>     | 0.79-0.89* |
| Less than High School         |                   |       | <b>0.76</b>     | 0.66-0.86* | <b>0.74</b>     | 0.65-0.85* | <b>0.75</b>     | 0.66-0.86* |
| Unknown                       |                   |       | <b>0.97</b>     | 0.89-1.06  | <b>0.97</b>     | 0.89-1.05  | <b>0.97</b>     | 0.89-1.05  |
| Body Mass Index               |                   |       |                 |            |                 |            |                 |            |
| Normal weight                 |                   |       | <b>1.00</b>     |            | <b>1.00</b>     |            | <b>1.00</b>     |            |
| Underweight                   |                   |       | <b>0.88</b>     | 0.81-0.96* | <b>0.88</b>     | 0.81-0.96* | <b>0.88</b>     | 0.81-0.96* |
| Overweight                    |                   |       | <b>0.86</b>     | 0.8-0.93*  | <b>0.86</b>     | 0.79-0.93* | <b>0.86</b>     | 0.80-0.93* |
| Obese                         |                   |       | <b>0.79</b>     | 0.69-0.92* | <b>0.79</b>     | 0.68-0.91* | <b>0.79</b>     | 0.68-0.92* |
| Unknown                       |                   |       | <b>0.68</b>     | 0.62-0.75* | <b>0.68</b>     | 0.62-0.75* | <b>0.68</b>     | 0.62-0.75* |
| <b>Cycle (2003-2012)</b>      |                   |       | <b>1.01</b>     | 0.99-1.03  | <b>1.01</b>     | 0.99-1.03  | <b>1.01</b>     | 0.99-1.02  |
| <b>Season</b>                 |                   |       |                 |            |                 |            |                 |            |
| Summer                        |                   |       | <b>1.00</b>     |            | <b>1.00</b>     |            | <b>1.00</b>     |            |
| Winter                        |                   |       | <b>0.58</b>     | 0.54-0.62* | <b>0.58</b>     | 0.54-0.62* | <b>0.58</b>     | 0.53-0.62* |
| Transitional                  |                   |       | <b>0.66</b>     | 0.63-0.7*  | <b>0.66</b>     | 0.62-0.7*  | <b>0.66</b>     | 0.62-0.70* |
| <b>Area-based</b>             |                   |       |                 |            |                 |            |                 |            |
| MIZ                           |                   |       |                 |            |                 |            |                 |            |
| Urban                         |                   |       |                 |            | <b>1.00</b>     |            |                 |            |
| Suburban                      |                   |       |                 |            | <b>1.12</b>     | 1.04-1.21* | <b>1.13</b>     | 1.05-1.22* |
| Rural                         |                   |       |                 |            | <b>1.13</b>     | 1.04-1.23* | <b>1.14</b>     | 1.05-1.24* |
| Social deprivation quintile   |                   |       |                 |            |                 |            |                 |            |
| Most privileged               |                   |       |                 |            |                 |            | <b>1.00</b>     |            |
| Privileged                    |                   |       |                 |            |                 |            | <b>1.05</b>     | 0.95-1.16  |
| Median                        |                   |       |                 |            |                 |            | <b>0.96</b>     | 0.87-1.06  |
| Deprived                      |                   |       |                 |            |                 |            | <b>0.97</b>     | 0.88-1.07  |
| Most deprived                 |                   |       |                 |            |                 |            | <b>0.95</b>     | 0.84-1.06  |
| Material deprivation quintile |                   |       |                 |            |                 |            |                 |            |
| Most privileged               |                   |       |                 |            |                 |            | <b>1.00</b>     |            |
| Privileged                    |                   |       |                 |            |                 |            | <b>1.05</b>     | 0.96-1.15  |
| Median                        |                   |       |                 |            |                 |            | <b>1.05</b>     | 0.96-1.14  |
| Deprived                      |                   |       |                 |            |                 |            | <b>1.05</b>     | 0.96-1.16  |
| Most deprived                 |                   |       |                 |            |                 |            | <b>0.94</b>     | 0.84-1.05  |
| <b>Geographical hierarchy</b> |                   |       |                 |            |                 |            |                 |            |
|                               | Variance (S.E.)   | MOR   | Variance (S.E.) | MOR        | Variance (S.E.) | MOR        | Variance (S.E.) | MOR        |

1  
2  
3  
4  
5  
6  
7  
8  
9  
10  
11  
12  
13  
14  
15  
16  
17  
18  
19  
20  
21  
22  
23  
24  
25  
26  
27  
28  
29  
30  
31  
32  
33  
34  
35  
36  
37  
38  
39  
40  
41  
42  
43  
44  
45  
46  
47  
48  
49  
50  
51  
52  
53  
54  
55  
56  
57  
58  
59  
60

|                                      |                   |      |                   |      |                   |      |                   |      |
|--------------------------------------|-------------------|------|-------------------|------|-------------------|------|-------------------|------|
| Province                             | 0.022<br>(0.016)  | 1.15 | 0.025<br>(0.017)  | 1.16 | 0.028<br>(0.019)  | 1.17 | 0.027<br>(0.019)  | 1.17 |
| Health Region                        | 0.018<br>(0.005)* | 1.14 | 0.016<br>(0.005)* | 1.13 | 0.014<br>(0.005)* | 1.12 | 0.014<br>(0.005)* | 1.12 |
| Neighbourhood                        | 0.017<br>(0.007)* | 1.13 | 0.015<br>(0.01)   | 1.12 | 0.026<br>(0.009)* | 1.17 | 0.02<br>(0.011)   | 1.14 |
| <b>Deviance Information Criteria</b> | 35536.98          |      | 35007             |      | 35001             |      | 35003             |      |
| $\Delta$ DIC                         |                   |      | -530              |      | -6                |      | 2                 |      |

\* Significant with  $\alpha=0,05$ ; Source: CCHS (2003-2012)

Confidential

|                               | <i>Null Model</i> |       | <i>Model 2</i> |            | <i>Model 3</i> |            | <i>Model 4</i> |            |
|-------------------------------|-------------------|-------|----------------|------------|----------------|------------|----------------|------------|
|                               | OR                | 95%CI | OR             | 95%CI      | OR             | 95%CI      | OR             | 95%CI      |
| <b>Individual</b>             |                   |       |                |            |                |            |                |            |
| Age                           |                   |       |                |            |                |            |                |            |
| 12-15                         |                   |       | <b>1.00</b>    |            | <b>1.00</b>    |            | <b>1.00</b>    |            |
| 16-17                         |                   |       | <b>0.88</b>    | 0,83-0,92* | <b>0.88</b>    | 0,83-0,92* | <b>0.88</b>    | 0,83-0,92* |
| Origin                        |                   |       |                |            |                |            |                |            |
| Caucasian                     |                   |       | <b>1.00</b>    |            | <b>1.00</b>    |            | <b>1.00</b>    |            |
| Asian                         |                   |       | <b>0.86</b>    | 0,78-0,95* | <b>0.86</b>    | 0,77-0,95* | <b>0.86</b>    | 0,78-0,95* |
| Others                        |                   |       | <b>1.35</b>    | 1,21-1,51* | <b>1.34</b>    | 1,20-1,50* | <b>1.35</b>    | 1,21-1,51* |
| Unknown                       |                   |       | <b>1.25</b>    | 1,15-1,37* | <b>1.25</b>    | 1,14-1,38* | <b>1.26</b>    | 1,15-1,38* |
| Household education level     |                   |       |                |            |                |            |                |            |
| University                    |                   |       | <b>1.00</b>    |            | <b>1.00</b>    |            | <b>1.00</b>    |            |
| High School and College       |                   |       | <b>0.93</b>    | 0,82-1,06  | <b>0.94</b>    | 0,83-1,07  | <b>0.95</b>    | 0,84-1,08  |
| Less then High School         |                   |       | <b>0.94</b>    | 0,89-1*    | <b>0.94</b>    | 0,89-1*    | <b>0.95</b>    | 0,9-1,01   |
| Unknown                       |                   |       | <b>1.01</b>    | 0,93-1,09  | <b>1.01</b>    | 0,94-1,10  | <b>1.02</b>    | 0,94-1,1   |
| Body Mass Index               |                   |       |                |            |                |            |                |            |
| Normal weight                 |                   |       | <b>1.00</b>    |            | <b>1.00</b>    |            | <b>1.00</b>    |            |
| Underweight                   |                   |       | <b>0.63</b>    | 0,56-0,7*  | <b>0.63</b>    | 0,56-0,70* | <b>0.63</b>    | 0,56-0,7*  |
| Overweight                    |                   |       | <b>0.92</b>    | 0,86-0,98* | <b>0.92</b>    | 0,86-0,98* | <b>0.92</b>    | 0,86-0,98* |
| Obese                         |                   |       | <b>0.59</b>    | 0,53-0,65* | <b>0.59</b>    | 0,53-0,65* | <b>0.59</b>    | 0,53-0,65* |
| Unknown                       |                   |       | <b>0.52</b>    | 0,47-0,58* | <b>0.52</b>    | 0,47-0,58* | <b>0.52</b>    | 0,47-0,58* |
| <b>Cycle and season</b>       |                   |       |                |            |                |            |                |            |
| Cycle (2003-2012)             |                   |       | <b>0.98</b>    | 0,96-0,99* | <b>0.98</b>    | 0,96-0,99* | <b>0.98</b>    | 0,96-0,99* |
| Season                        |                   |       |                |            |                |            |                |            |
| Summer                        |                   |       | <b>1.00</b>    |            | <b>1.00</b>    |            | <b>1.00</b>    |            |
| Winter                        |                   |       | <b>0.55</b>    | 0,51-0,59* | <b>0.55</b>    | 0,51-0,59* | <b>0.55</b>    | 0,51-0,59* |
| Transitional                  |                   |       | <b>0.7</b>     | 0,67-0,74* | <b>0.7</b>     | 0,66-0,74* | <b>0.7</b>     | 0,66-0,74* |
| <b>Area-based</b>             |                   |       |                |            |                |            |                |            |
| MIZ                           |                   |       |                |            |                |            |                |            |
| Urban                         |                   |       |                |            | <b>1.00</b>    |            |                |            |
| Suburban                      |                   |       |                |            | <b>0.95</b>    | 0,89-1,02  | <b>0.96</b>    | 0,89-1,03  |
| Rural                         |                   |       |                |            | <b>0.99</b>    | 0,91-1,07  | <b>1</b>       | 0,92-1,08  |
| Social deprivation quintile   |                   |       |                |            |                |            |                |            |
| Most privileged               |                   |       |                |            |                |            | <b>1.00</b>    |            |
| Privileged                    |                   |       |                |            |                |            | <b>1</b>       | 0,91-1,09  |
| Median                        |                   |       |                |            |                |            | <b>0.98</b>    | 0,89-1,08  |
| Deprived                      |                   |       |                |            |                |            | <b>1</b>       | 0,91-1,09  |
| Most deprived                 |                   |       |                |            |                |            | <b>0.92</b>    | 0,83-1,03  |
| Material deprivation quintile |                   |       |                |            |                |            |                |            |
| Most privileged               |                   |       |                |            |                |            | <b>1.00</b>    |            |
| Privileged                    |                   |       |                |            |                |            | <b>0.96</b>    | 0,88-1,04  |
| Median                        |                   |       |                |            |                |            | <b>0.98</b>    | 0,9-1,07   |
| Deprived                      |                   |       |                |            |                |            | <b>0.95</b>    | 0,87-1,04  |
| Most deprived                 |                   |       |                |            |                |            | <b>0.95</b>    | 0,85-1,06  |

1  
2  
3  
4  
5  
6  
7  
8  
9  
10  
11  
12  
13  
14  
15  
16  
17  
18  
19  
20  
21  
22  
23  
24  
25  
26  
27  
28  
29  
30  
31  
32  
33  
34  
35  
36  
37  
38  
39  
40  
41  
42  
43  
44  
45  
46  
47  
48  
49  
50  
51  
52  
53  
54  
55  
56  
57  
58  
59  
60

| <i>Geographical hierarchy</i>              | Variance (S.E.)  | MOR  | Variance (S.E.)   | MOR  | Variance (S.E.)   | MOR  | Variance (S.E.)   | MOR  |
|--------------------------------------------|------------------|------|-------------------|------|-------------------|------|-------------------|------|
| Province                                   | 0,014<br>(0,02)  | 1.12 | 0,016<br>(0,013)  | 1.13 | 0,016<br>(0,013)  | 1.13 | 0,016<br>(0,014)  | 1.13 |
| Health Region                              | 0,02<br>(0,006)* | 1.14 | 0,018<br>(0,005)* | 1.14 | 0,017<br>(0,005)* | 1.13 | 0,018<br>(0,006)* | 1.14 |
| Neighbourhood                              | 0,018<br>(0,01)  | 1.14 | 0,008<br>(0,009)  | 1.09 | 0,023<br>(0,009)* | 1.16 | 0,017<br>(0,009)  | 1.13 |
| <b>Deviance Information Criteria (DIC)</b> | 38562            |      | 37919             |      | 37919.3           |      | 37929.01          |      |
| $\Delta$ DIC                               |                  |      | -643              |      | 0.3               |      | 9.7               |      |

\* Significant with  $\alpha=0,05$ ; Source: CCHS (2003-2012)

Confidential



Figure 1. Provincial level residual analysis

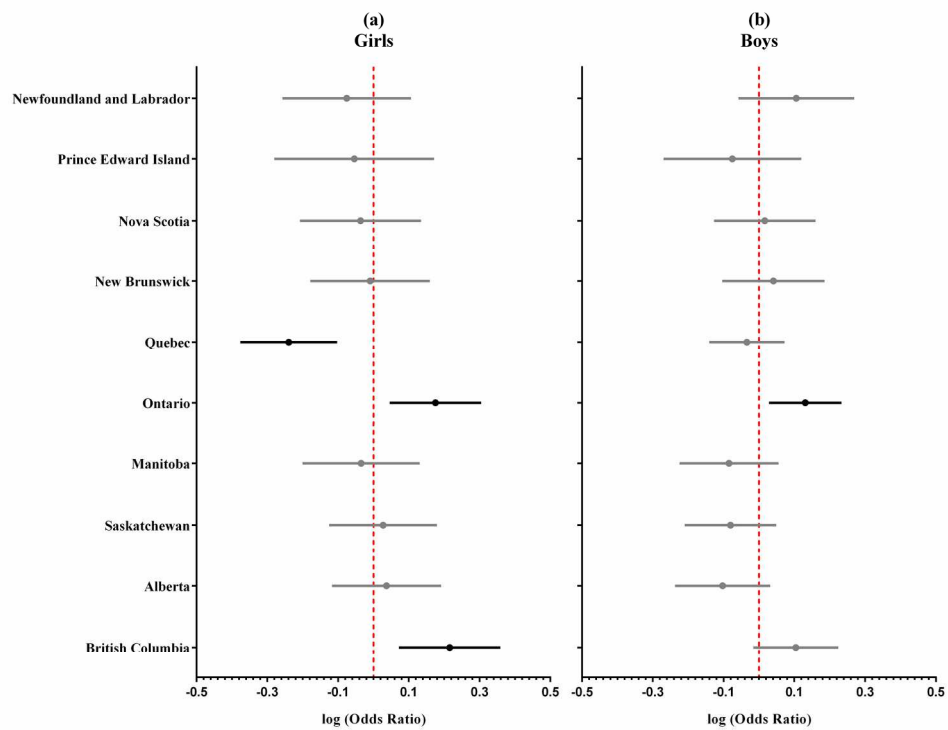

Province-level residuals of the logarithm of the odds ratio among (1A) Girls & (1B) Boys  
 193x156mm (300 x 300 DPI)
